# Supplementary material for: Highly porous nitrogen-doped carbon for superior electric double-layer capacitors
Source: Royal Society of Chemistry journal article supplement (doi:10.1039/c7ra09272e), 2017-01-01
Supplement: c7ra09272e1.pdf [file c7ra09272e1.pdf]

## Supporting Information

### **Highly Porous Nitrogen-Doped Carbon for Superior Electric Double-Layer Capacitors**

Da Sol Jeong<sup>a</sup>, Je Moon Yun<sup>\*b</sup>, Kwang-Ho Kim<sup>\*ab</sup>

*<sup>a</sup>Department of Materials Science and Engineering, Pusan National University, San 30  
Jangjeon-dong, Geumjeong-gu, Busan 609-735, Republic of Korea*

*<sup>b</sup>Global Frontier R&D Center for Hybrid Interface Materials, Pusan National University, 30  
Jangjeon-dong, Geumjung-gu, Busan 609-735, Republic of Korea*

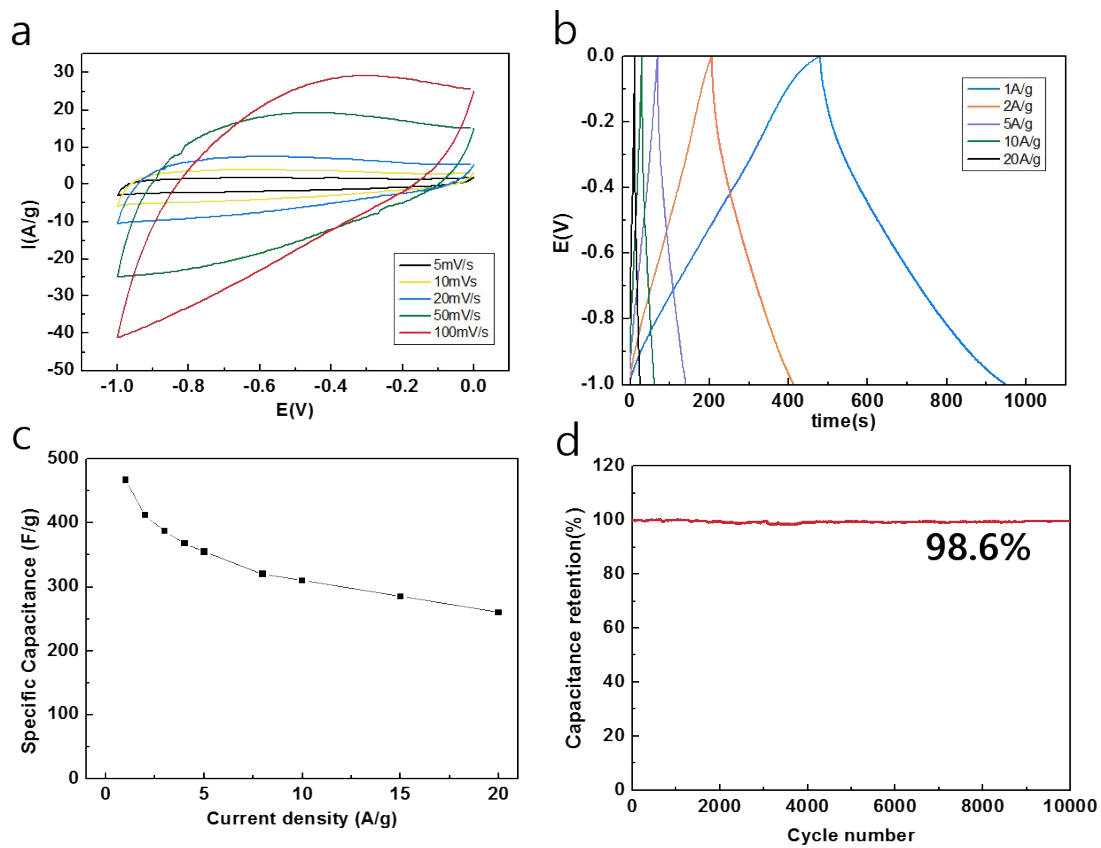

Figure S1. Cyclic voltammetry (a) and Galvanostatic Charge/discharge (b), Rate performance (c), Capacitance retention at current density 10A/g (d) of the PANC-3.

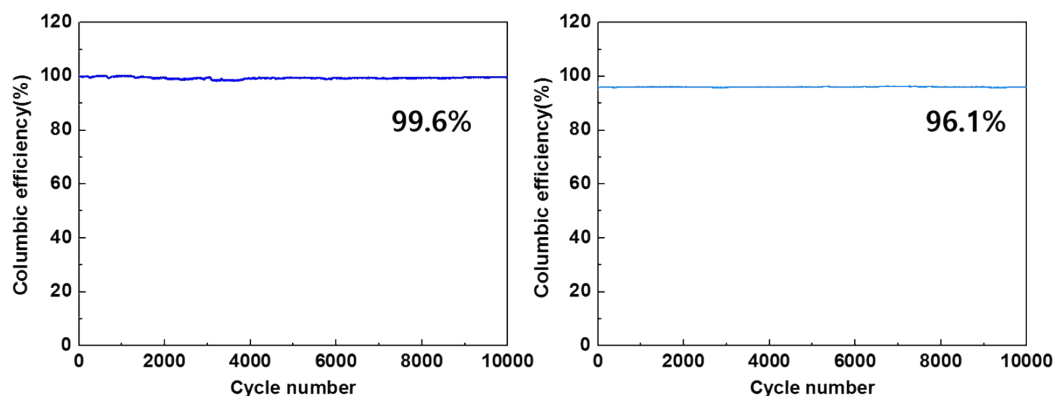

Figure S2. Coulombic efficiency of the PANC-3 in the three electrode system (a) and two-electrode system (b).

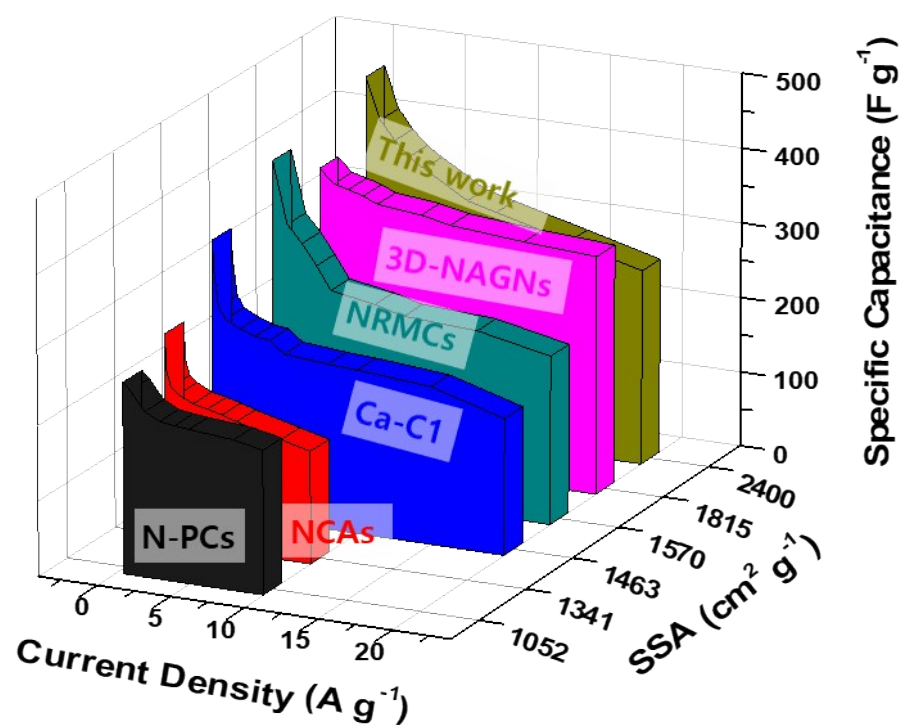

Figure S3. Comparison of electrochemical properties of PANC-3 with other reported Nitrogen doped carbons. (N-PCs: ref. S1; NCAs: ref. S2; Ca-C1: ref. S3; NRMCS: ref. S4; 3D-NAGNs: ref. S5)

## Reference

- S1. Guofu Ma, Qian Yang, Kanjun Sun, Hui Peng, Feitian Ran, Xiaolong Zhao, Ziqiang Lei, *Bioresource Technology*, 2015, **197**, 137–142
- S2. Jingui Jiang, Hao Chen, Zhao Wang, Luke Bao, Yiwei Qiang, Shiyu Guan, Jianding Chen, *J. Colloid Interface Sci.*, 2015, **452**, 54–61
- S3. Min Zhou, Fan Pu, Zhao Wang, Shiyu Guan, *Carbon*, 2014, **68**, 185-194
- S4. Fei Sun, Jihui Gao, Xinxin Pi, Lijie Wang, Yuqi Yang, Zhibin Qu, Shaohua Wu, *J. Power Sources*, 2017, **337**, 189-196
- S5. Zesheng Li, Bolin Li, Zhisen Liu, Dehao Li, Hongqiang Wang, Qingyu Li, *Electrochim. Acta*, 2016, **190**, 378-387
